# Supplementary material for: Using qPCR to compare the detection of Plasmodium vivax oocysts and sporozoites in Anopheles farauti mosquitoes between two DNA extraction methods
Source: Frontiers journal article supplement (doi:10.3389/fpara.2023.1063452), 2023-03-16
Supplement: Data_Sheet_1.PDF [file Data_Sheet_1.PDF]

## Supplementary 1

**Table S1.** Oocyst counts and whether they were processed by heating or DNA extraction.

| <b>Number of<br/>oocyst/mosquito</b> | <b>Number of<br/>Mosquitoes</b> | <b>Heating / DNA<br/>extraction</b> |
|--------------------------------------|---------------------------------|-------------------------------------|
| 1                                    | 17                              | Heating                             |
| 2                                    | 5                               | Heating                             |
| 3                                    | 6                               | Heating                             |
| 4                                    | 4                               | Heating                             |
| 5                                    | 2                               | Heating                             |
| 6                                    | 1                               | Heating                             |
| 7                                    | 1                               | Heating                             |
| 10                                   | 1                               | Heating                             |
| Pools                                | 36                              | Heating                             |
| 1                                    | 17                              | DNA extraction                      |
| 2                                    | 4                               | DNA extraction                      |
| 3                                    | 4                               | DNA extraction                      |
| 4                                    | 5                               | DNA extraction                      |
| 6                                    | 1                               | DNA extraction                      |
| 8                                    | 1                               | DNA extraction                      |
| 13                                   | 1                               | DNA extraction                      |
| 14                                   | 1                               | DNA extraction                      |
| 46                                   | 1                               | DNA extraction                      |
| Pools                                | 36                              | DNA extraction                      |

**Table S2.** Sporozoites classification and whether they were processed by heating or DNA extraction.

| <b>Sporozoite<br/>classification*</b> | <b>Number of<br/>Mosquitoes</b> | <b>Heating / DNA<br/>extraction</b> |
|---------------------------------------|---------------------------------|-------------------------------------|
| High                                  | 17                              | Heating                             |
| Moderate                              | 9                               | Heating                             |
| Low                                   | 4                               | Heating                             |
| Negative                              | 8                               | Heating                             |
| High                                  | 17                              | DNA extraction                      |
| Moderate                              | 9                               | DNA extraction                      |

|          |   |                |
|----------|---|----------------|
| Low      | 4 | DNA extraction |
| Negative | 8 | DNA extraction |

---

\* High >100 sporozoites, Moderate 20 -100, Low 1-20 sporozoites
